# Supplementary material
Source: HighWire-hosted journal article supplement (https://www.jneurosci.org/highwire/filestream/599770/field_highwire_adjunct_files/0/Figure_S1.pdf)
Supplement: Figure_S1.pdf [file Figure_S1.pdf]

# Supplemental Fig. 1.

|                                        |                             |                           |                                    |                                 |
|----------------------------------------|-----------------------------|---------------------------|------------------------------------|---------------------------------|
| <b>A. Sulfide category</b>             |                             |                           |                                    |                                 |
| ① 1-hexanethiol (6-SH)<br>             | ② 1-octanethiol (8-SH)<br>  | ③ propyl sulfide<br>      | ④ ethyl sulfide<br>                | ⑤ tetrahydrothiophene<br>       |
| <b>B. Ester category</b>               |                             |                           |                                    |                                 |
| ① ethyl butyrate<br>                   | ② amyl hexanoate<br>        | ③ b-γ-hexenyl acetate<br> | ④ terpinyl acetate<br>             | ⑤ isoamyl acetate<br>           |
| <b>C. Terpene hydrocarbon category</b> |                             |                           |                                    |                                 |
| ① myrcene<br>                          | ② d-limonene<br>            | ③ α-pinene<br>            | ④ α-phellandrene<br>               | ⑤ α-cadinene<br>                |
| <b>D. Acid category</b>                |                             |                           |                                    |                                 |
| ① propionic acid<br>                   | ② n-hexanoic acid<br>       | ③ n-Nonanoic acid<br>     | ④ cyclopentane carboxylic acid<br> | ⑤ n-methyl butyric acid<br>     |
| <b>E. Ether category</b>               |                             |                           |                                    |                                 |
| ① methyl n-propyl ether<br>            | ② dipropyl ether<br>        | ③ butyl methyl ether<br>  | ④ hexyl methyl ether<br>           | ⑤ butyl ethyl ether<br>         |
| <b>F. Aldehyde category</b>            |                             |                           |                                    |                                 |
| ① propylaldehyde<br>                   | ② n-valeraldehyde<br>       | ③ n-heptylaldehyde<br>    | ④ benzaldehyde<br>                 | ⑤ perilla aldehyde<br>          |
| <b>G. Lactone category</b>             |                             |                           |                                    |                                 |
| ① γ-butyrolactone<br>                  | ② γ-heptalactone<br>        | ③ δ-hexalactone<br>       | ④ δ-nonalactone<br>                | ⑤ γ-octalactone<br>             |
| <b>H. Alcohol category</b>             |                             |                           |                                    |                                 |
| ① propylalcohol<br>                    | ② n-hexyl alcohol<br>       | ③ n-octyl alcohol<br>     | ④ cis-3-hexenol<br>                | ⑤ benzyl alcohol<br>            |
| <b>I. Ketone category</b>              |                             |                           |                                    |                                 |
| ① n-propyl methyl ketone<br>           | ② n-heptyl ethyl ketone<br> | ③ carvone<br>             | ④ amyl cyclopentanone<br>          | ⑤ 3-methyl-2-cyclopentenone<br> |
| <b>J. Phenol category</b>              |                             |                           |                                    |                                 |
| ① eugenol<br>                          | ② anisol<br>                | ③ o-ethyl phenol<br>      | ④ p-n-propyl phenol<br>            | ⑤ 4-ethyl guaiacol<br>          |
